# Supplementary material
Source: PubMed Central journal article supplement (PMC5405431)
Supplement: PRO-26-985-s001.pdf [file PRO-26-985-s001.pdf]

## Supplementary Materials

### Structural and biochemical characterization of the nucleoside hydrolase from *C.*

*elegans* reveals the role of two active site cysteine residues in catalysis

Ranjan Kumar Singh<sup>1,2</sup>, Jan Steyaert<sup>1,2</sup>, Wim Versées<sup>1,2,3</sup>

<sup>1</sup> Structural Biology Brussels, Vrije Universiteit Brussel (VUB), Pleinlaan 2, 1050 Brussels, Belgium

<sup>2</sup> VIB-VUB Center for Structural Biology, Pleinlaan 2, 1050 Brussels, Belgium

<sup>3</sup> Corresponding author. Structural Biology Brussels, Vrije Universiteit Brussel, Pleinlaan 2, 1050 Brussel, Belgium. Tel.: +32 2 629 18 49; fax: +32 2 629 19 63.  
E-mail address: [wim.versees@vib-vub.be](mailto:wim.versees@vib-vub.be)

### Supplementary Information: Figures and Table

**Figure S1-S3**

**Table S1**



**Figure S1.** Sequence alignment of representatives of the three homology groups of nucleoside hydrolases. 15 organisms of each group are selected and aligned separately. The first 15 (starting from Yeik), second 15 (starting from *T.vivax*) and the last 15 (starting from *C.elegans*) correspond to group I, II and III NHs respectively. Residues within an orange colored box correspond to either the  $\beta$ 3- $\alpha$ 3 loop (loop 1) or the C-terminus of  $\alpha$ 9 (loop2). Residues highlighted in yellow correspond to C42 of CeNH. This position corresponds to an asparagine in group I, an aspartate in group II and is variable in group III NHs. Residues highlighted in green are the conserved histidine, tryptophan and cysteine for group I, II and III NHs respectively.

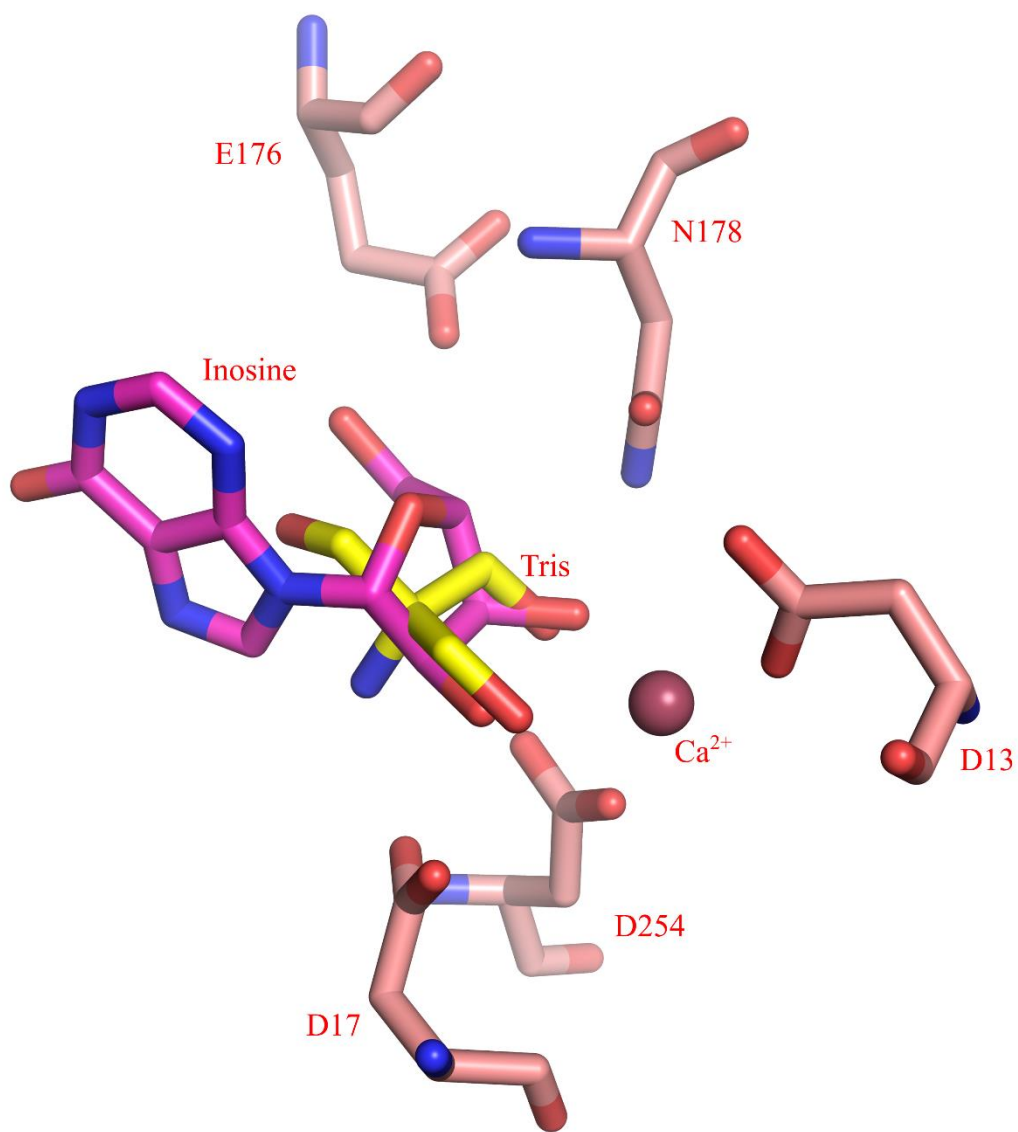

**Figure S2.** Overlay of the best docking conformation of inosine and the active site-bound Tris molecule observed in the CeNH structure. The residues within interaction distance of the 2', 3' and 5' hydroxyl groups of inosine and the corresponding hydroxyl groups of Tris are shown as sticks.  $\text{Ca}^{2+}$  is shown as a red sphere. The Tris and inosine molecules are shown as sticks with yellow and magenta carbons respectively.

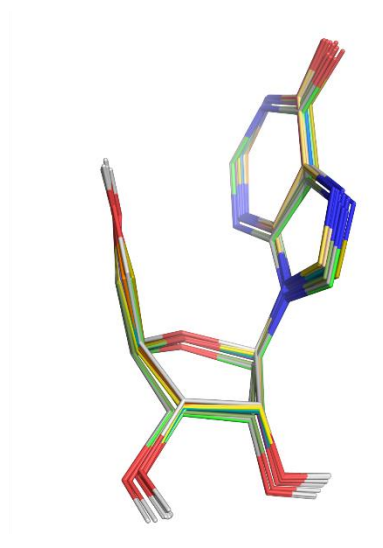

**Figure S3.** Superposition of 17 out of 20 minimum energy conformations of inosine docked to the CeNH active site, starting from an inosine conformation taken from the Yeik-inosine crystal structure (PDB 3B9X). 3 higher energy outliers with an entirely different conformation are rejected and are not shown here.

**Table S1.** SAXS data collection statistics and derived parameters.

| <b>Data-collection parameters</b>                  |                            |
|----------------------------------------------------|----------------------------|
| X-Ray Source                                       | BioSAXS (Rigaku)           |
| Wavelength                                         | 1.54 Å                     |
| q range (Å <sup>-1</sup> )*                        | 0.0094-0.6880              |
| <b>Protein concentrations (mg/ml)- volume (µl)</b> |                            |
| Protein concentrations (mg/ml)- volume (µl)        | 1.5-8.0 mg/ml -70 µl       |
| Temperature (K)                                    | 283                        |
| <b>Structural parameters</b>                       |                            |
| I(0) (relative) from P(R)                          | 24.46 ± 0.05               |
| R <sub>g</sub> (Å) from P(R)                       | 37.7 ± 0.1                 |
| I(0) (relative) from Guinier                       | 24.56 ± 0.07               |
| R <sub>g</sub> (Å) from Guinier                    | 37.7 ± 0.1                 |
| D <sub>max</sub> (Å)                               | 125 ± 5                    |
| Porod volume (Å <sup>3</sup> )                     | 277109                     |
| <b>Molecular mass determination (kDa)</b>          |                            |
| From Porod volume ( $V_{\text{porod}}/1.7$ )       | 163.0                      |
| From Q <sub>R</sub> (q=0.25 Å <sup>-1</sup> )      | 135.0                      |
| From Sequence (including tag)                      | 154.0                      |
| <b>Data processing software</b>                    |                            |
| Primary data reduction                             | ATSAS for BioSAXS (Rigaku) |
| Data Processing                                    | PRIMUS, SCATTER, GNOM      |
| Computation of model intensities                   | CRY SOL                    |

Abbreviations: I(0), extrapolated scattering intensity at zero angle; R<sub>g</sub>, radius of gyration calculated using either Guinier approximation (from Guinier) or the indirect Fourier transform package GNOM [from P(R)], D<sub>max</sub>, maximal particle dimension; V<sub>p</sub>, Porod volume.

\*Momentum transfer  $|q| = 4\pi\sin(\theta)/\lambda$ .
